# Supplementary material for: Small molecules based on diphenylamine and carbazole with large two-photon absorption cross sections and extraordinary AIEE properties
Source: Royal Society of Chemistry journal article supplement (doi:10.1039/c4ra06314g), 2014-01-01
Supplement: c4ra06314g1.pdf [file c4ra06314g1.pdf]

## Electronic Supplementary Information (ESI)

### **Small molecules based on diphenylamine and carbazole with large two-photon absorption cross sections and extraordinary AIEE properties**

Guojian Tian,<sup>a</sup> Wei Huang,<sup>a</sup> Shengyun Cai,<sup>a</sup> Haitao Zhou,<sup>a</sup> Bo Li,<sup>b</sup> Qiaochun  
Wang<sup>a</sup> and Jianhua Su <sup>\*a</sup>

<sup>a</sup>Key Laboratory for Advanced Materials and Institute of Fine Chemicals, East China  
University of Science & Technology, Shanghai, 200237, P. R. China. E-mail:

[bbsjh@ecust.edu.cn](mailto:bbsjh@ecust.edu.cn); Fax: +86-21-64252758

<sup>b</sup>Key Laboratory of Polar Materials and Devices, Ministry of Education, East China Normal  
University, Shanghai, 200241, P. R. China.

1. **Fig. 2** The one-photon absorption of **T1-T2** in THF at a concentration of  $1.0 \times 10^{-5}$  M.
2. **Fig. 3** The emission spectra of **T1-T2** in different solvents at the concentration of  $1.0 \times 10^{-5}$  M.
3. **Fig. 8** The 2PA cross sections of **T1-T2** in CH<sub>2</sub>Cl<sub>2</sub>.
4. Experimental procedures for synthesis.
5. **Fig. S1-S6** <sup>1</sup>H, <sup>13</sup>C NMR and EI-TOF spectrum of **T1-T2**.
6. **Fig. 9** The effect of pH on the one-photon fluorescence of **T1-T2**.

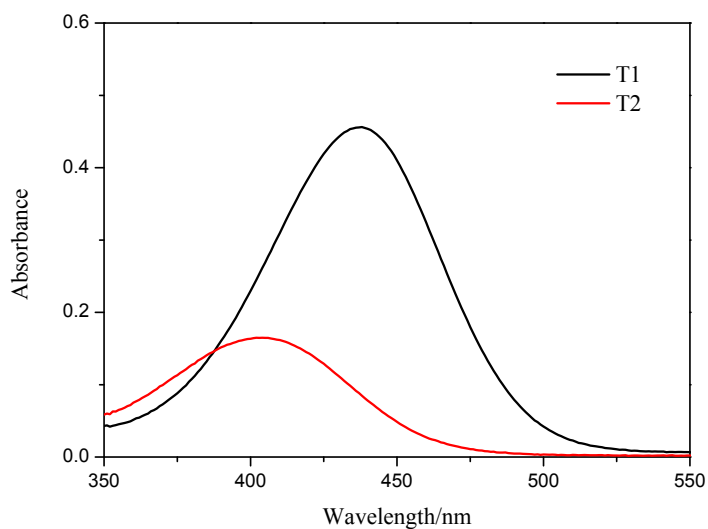

**Fig. 2** The one-photon absorption of **T1-T2** in THF at a concentration of  $1.0 \times 10^{-5}$  M.

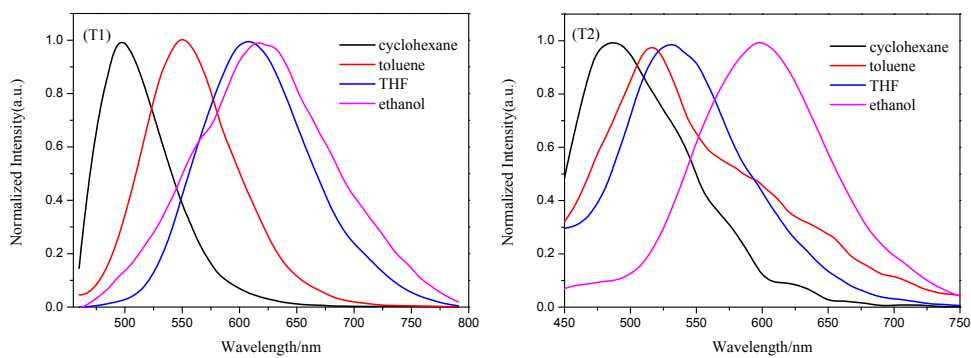

**Fig. 3** The emission spectra of **T1-T2** in different solvents at the concentration of  $1.0 \times 10^{-5}$  M.

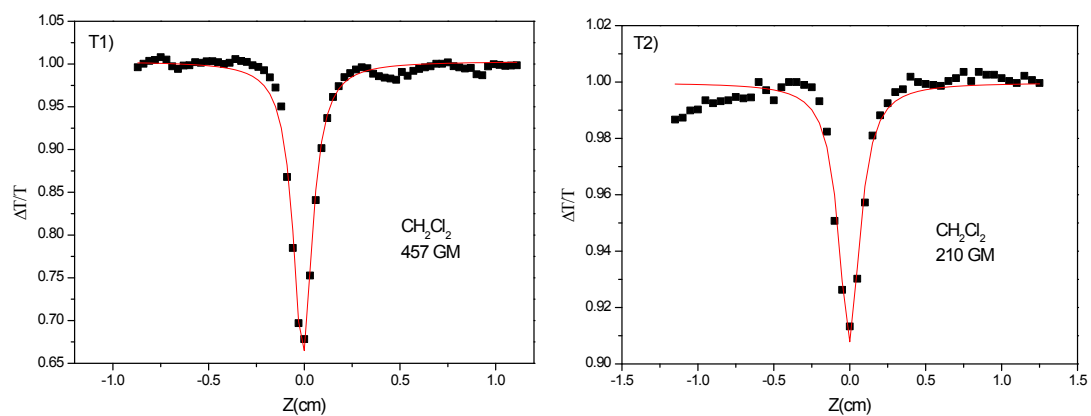

**Fig. 8** The 2PA cross sections of **T1-T2** in  $\text{CH}_2\text{Cl}_2$ .

#### 4. Experimental procedures for synthesis.

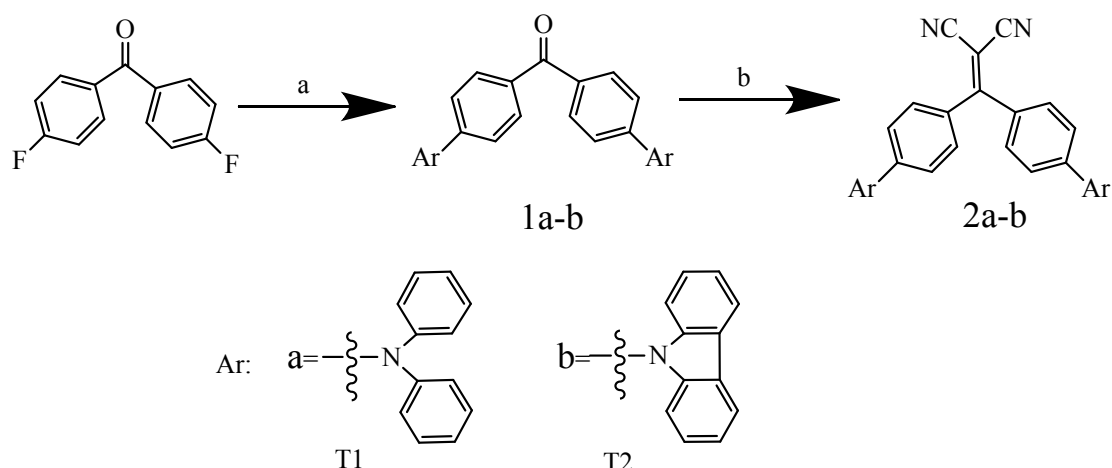

**Scheme 1.** Reagents and conditions: a) t-BuOK, DMF, 110°C, 10h; b) malononitrile, THF, Et<sub>3</sub>N, r.t, 2h.

#### Synthesis

**Bis(4-(diphenylamino)phenyl)methanone(1a):** In a three-neck flask, diphenylamine (3.4g 20mmol) and potassium tertbutoxide (3.37g 30mmol) were dissolved in 100mL anhydrous DMF, the bis(4-fluorophenyl)-methanone (2.18g 10mmol) was slowly dropped into 30mL anhydrous DMF solution. The reaction mixture was refluxed for 10 h under N<sub>2</sub> atmosphere, when the mixture was cooled and then poured into 200 mL ice water, then a deep yellow solid precipitate was filtered off and washed with ethanol. After vacuum evaporated obtaining a 3.6 g yellow solid. Yield: 79.0 %. <sup>1</sup>H NMR (CDCl<sub>3</sub>, 400 MHz, TMS)δ: 7.74 (m, 4H), 7.35 (m, 8H), 7.22 (m, 8H), 7.14 (m, 4H), 7.02 (d, *J* = 8.8 Hz, 4H).

**Bis(4-(9H-carbazol-9-yl)phenyl)methanone(1b):** Compound **1b** was synthesized by the same procedure as described above for **1a** using bis(4-fluorophenyl)methanone and carbazole. Yield: 85 %. <sup>1</sup>H NMR (CDCl<sub>3</sub>, 400 MHz, TMS)δ: 8.18 (dd, *J* = 8.1, 3.1 Hz, 8H), 7.80 (d, *J* = 8.5 Hz, 4H), 7.57 (d, *J* = 8.2 Hz, 4H), 7.48 (m, 4H), 7.37 (m, 4H).

**2-(bis(4-(diphenylamino)phenyl)methylene)malononitrile (2a):** In a one-neck flask, bis(4-(diphenylamino)phenyl)methanone (208 mg, 0.5 mmol) and malononitrile(50 mg, 0.75 mmol) were dissolved in THF (30 mL). Then a few drops of triethylamine were added and which was stirred at room temperature for 2 h. After vacuum evaporated obtaining the crude product and purifying by column chromatography (silica gel. CH<sub>2</sub>Cl<sub>2</sub>/petroleum ether =1:1, v/v) to give a yellow solid (115 mg, 43.0 %); <sup>1</sup>H NMR (CDCl<sub>3</sub>, 400 MHz, TMS)δ: 7.68 (d, *J* = 8.2 Hz, 4H), 7.31 (m, 8H), 7.17 (m, 8H), 7.12 (m, 4H), 7.02 (d, *J* = 7.8 Hz, 4H). <sup>13</sup>C NMR (CDCl<sub>3</sub>, 100MHz, TMS), 151.95, 145.92, 132.73, 129.70, 127.43, 126.39, 125.22, 118.73, 116.04. EI-TOF: [M] calcd for C<sub>40</sub>H<sub>28</sub>N<sub>4</sub>: 564.2314, found: 564.2312. Anal. Calcd for C<sub>40</sub>H<sub>28</sub>N<sub>4</sub>: C, 85.08; H, 5.00; N, 9.92. Found: C, 84.95; H, 5.03; N, 9.88 %.

**2-(bis(4-(9H-carbazol-9-yl)phenyl)methylene)malononitrile (2b):** Compound **2b** was synthesized by the same procedure as described above for **2a** using bis(4-fluorophenyl)methanone and carbazole. Yield: 41.0 %.  $^1\text{H}$  NMR ( $\text{CDCl}_3$ , 400 MHz, TMS)  $\delta$ : 8.17 (d,  $J = 4.2$  Hz, 4H), 7.84 (s, 8H), 7.59 (d,  $J = 8.1$  Hz, 4H), 7.48 (m, 4H), 7.36 (m, 4H).  $^{13}\text{C}$  NMR ( $\text{CDCl}_3$ , 100 MHz, TMS), 142.38, 142.31, 139.94, 133.87, 132.44, 126.63, 126.38, 124.09, 121.04, 120.60, 114.03, 109.82. EI-TOF: [M] calcd for  $\text{C}_{40}\text{H}_{24}\text{N}_4$ : 560.2001, found: 560.2002. Anal. Calcd for  $\text{C}_{40}\text{H}_{24}\text{N}_4$ : C, 85.69; H, 4.31; N, 9.99. Found: C, 85.52; H, 4.23; N, 9.97 %.

**5. Fig. S1-S6  $^1\text{H}$ ,  $^{13}\text{C}$  NMR and EI-TOF spectrum of T1-T2.**

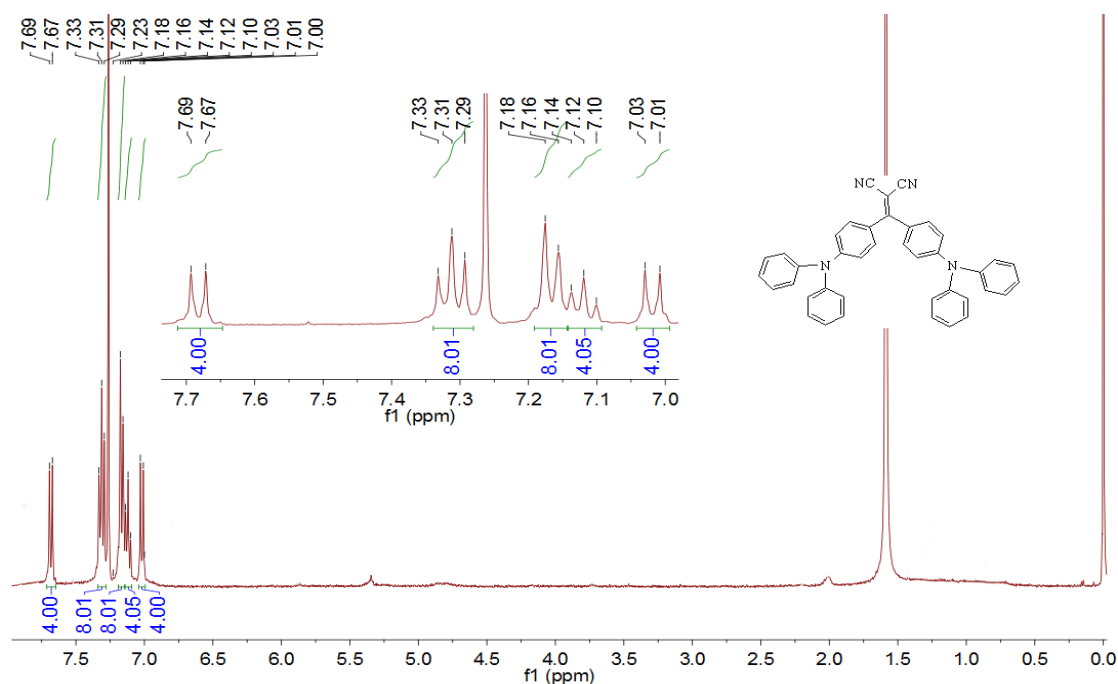

**Fig. S1  $^1\text{H}$  NMR ( $\text{CDCl}_3$ , 400 MHz) spectrum of T1.**

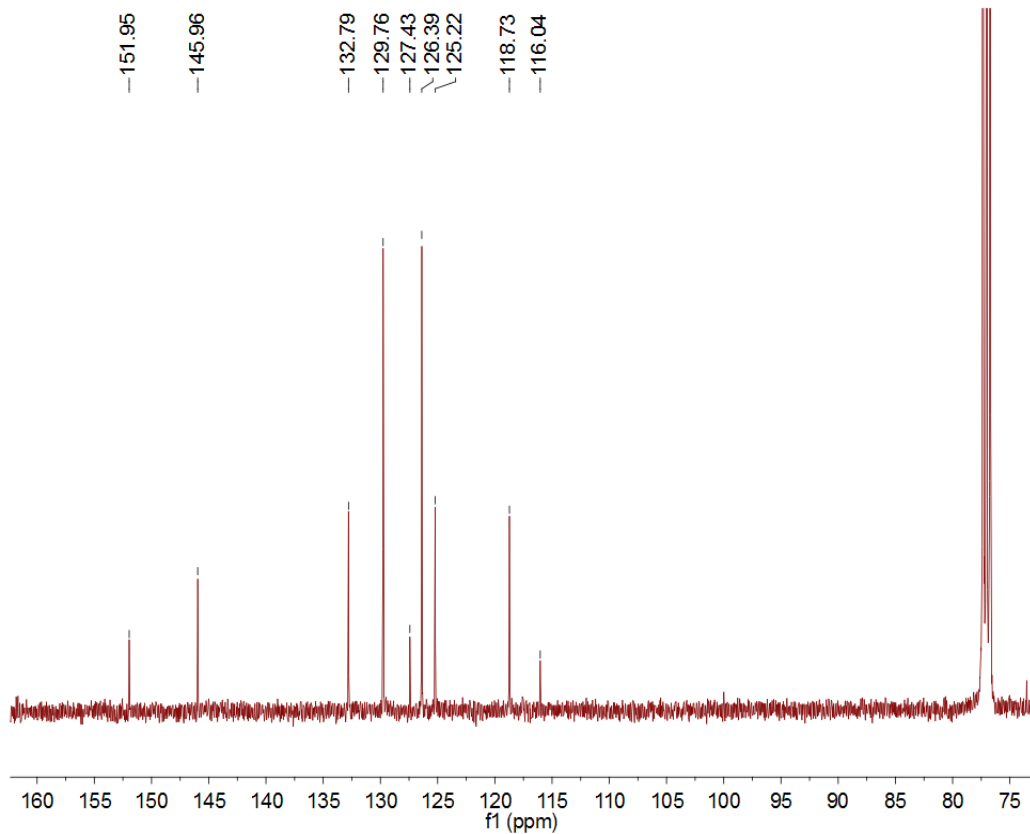

**Fig. S2**  $^{13}\text{C}$  NMR ( $\text{CDCl}_3$ , 100 MHz) spectrum of **T1**.

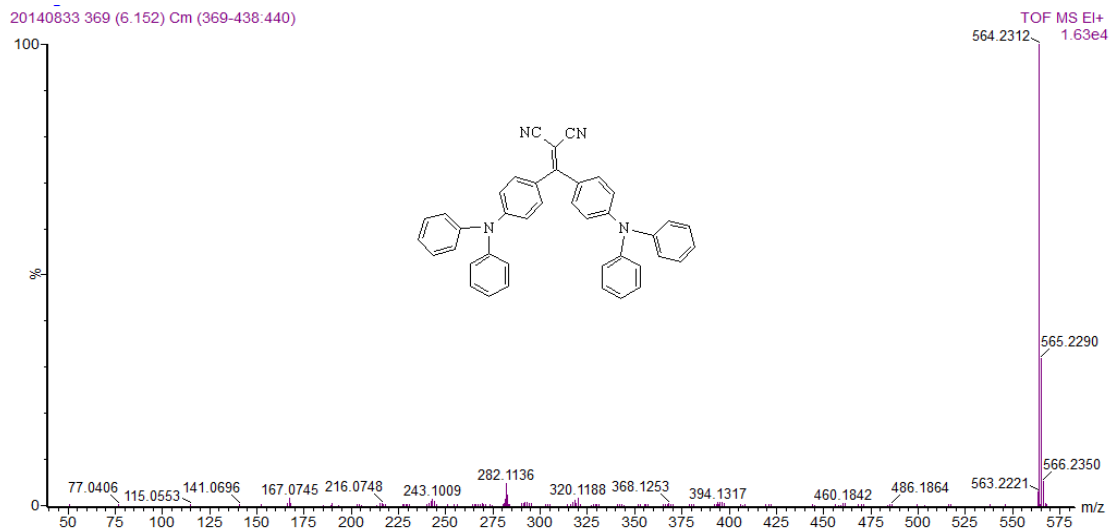

| Mass     | RA     | Calc. Mass | mDa  | PPM  | DBE  | i-FIT | Formula                                |
|----------|--------|------------|------|------|------|-------|----------------------------------------|
| 564.2312 | 100.00 | 564.2314   | -0.2 | -0.4 | 29.0 | 544.1 | $\text{C}_{40}\text{H}_{28}\text{N}_4$ |

**Fig. S3** EI-TOF spectrum of **T1**.

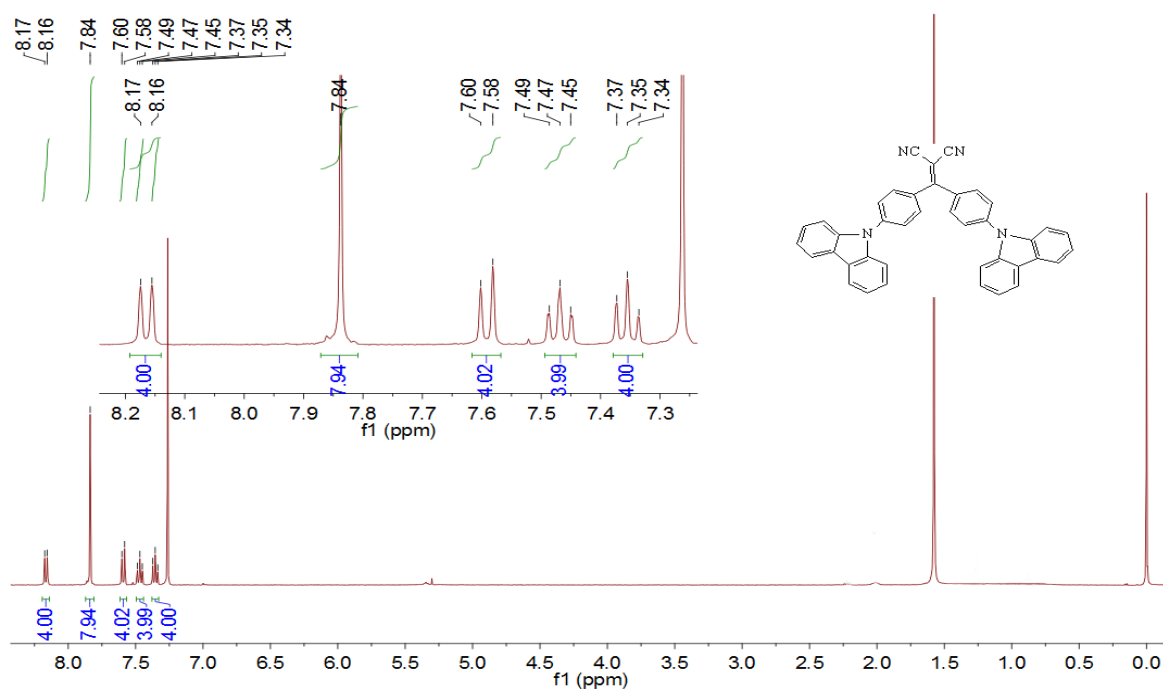

**Fig. S4**  $^1\text{H}$  NMR ( $\text{CDCl}_3$ , 400 MHz) spectrum of **T2**.

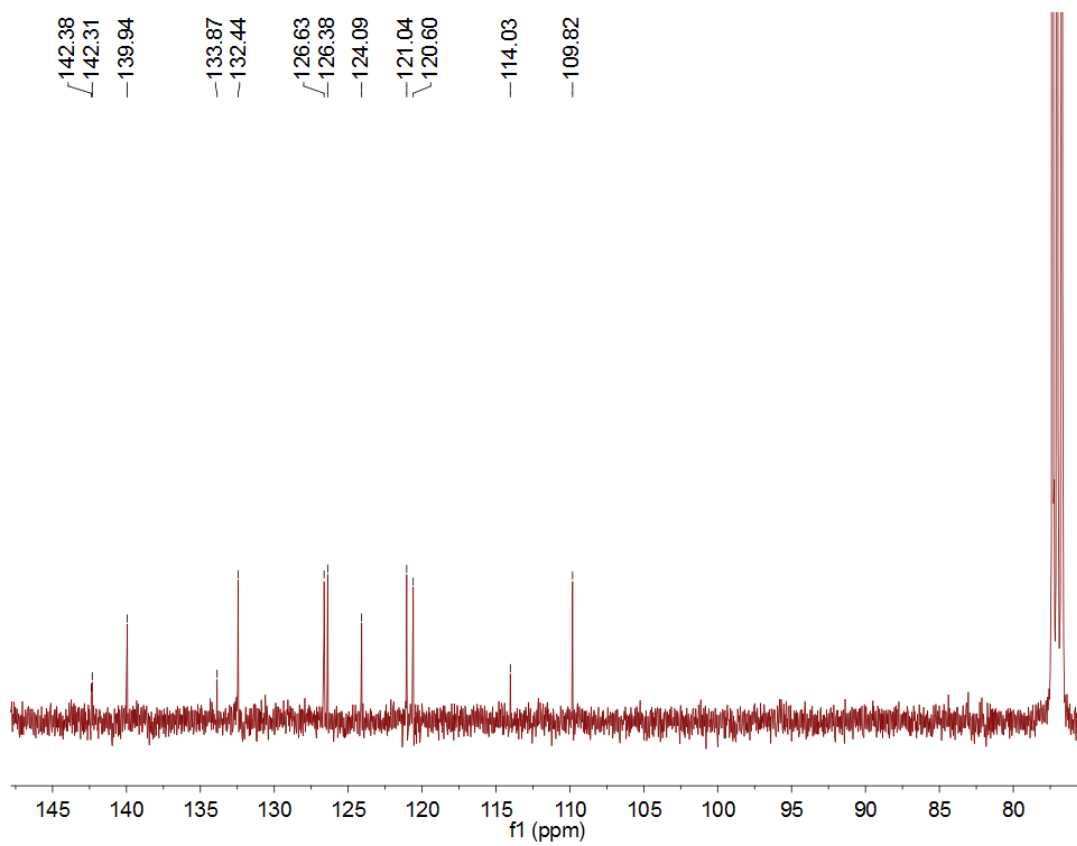

**Fig. S5**  $^{13}\text{C}$  NMR ( $\text{CDCl}_3$ , 100 MHz) spectrum of **T2**.

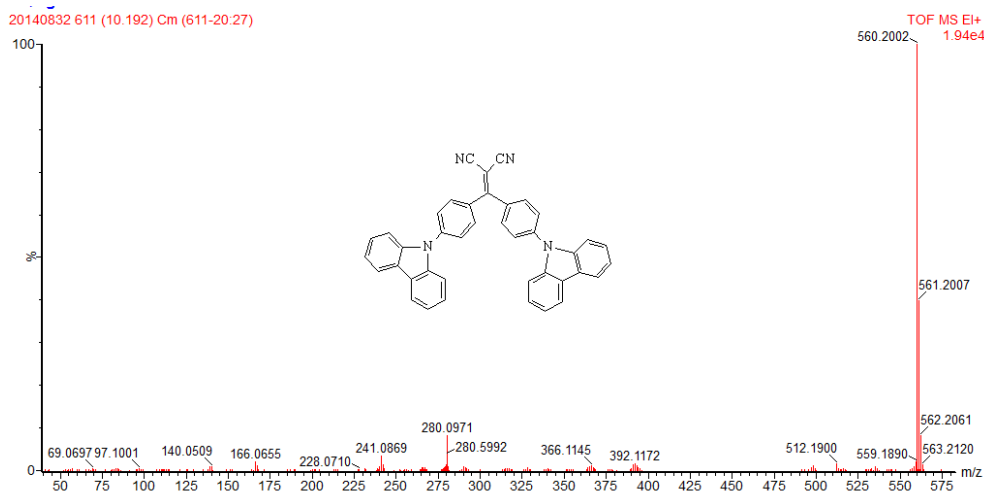

| Mass     | RA     | Calc. Mass | mDa | PPM | DBE  | i-FIT | Formula                                        |
|----------|--------|------------|-----|-----|------|-------|------------------------------------------------|
| 560.2002 | 100.00 | 560.2001   | 0.1 | 0.2 | 31.0 | 102.8 | C <sub>40</sub> H <sub>24</sub> N <sub>4</sub> |

**Fig. S6** EI-TOF spectrum of **T2**.

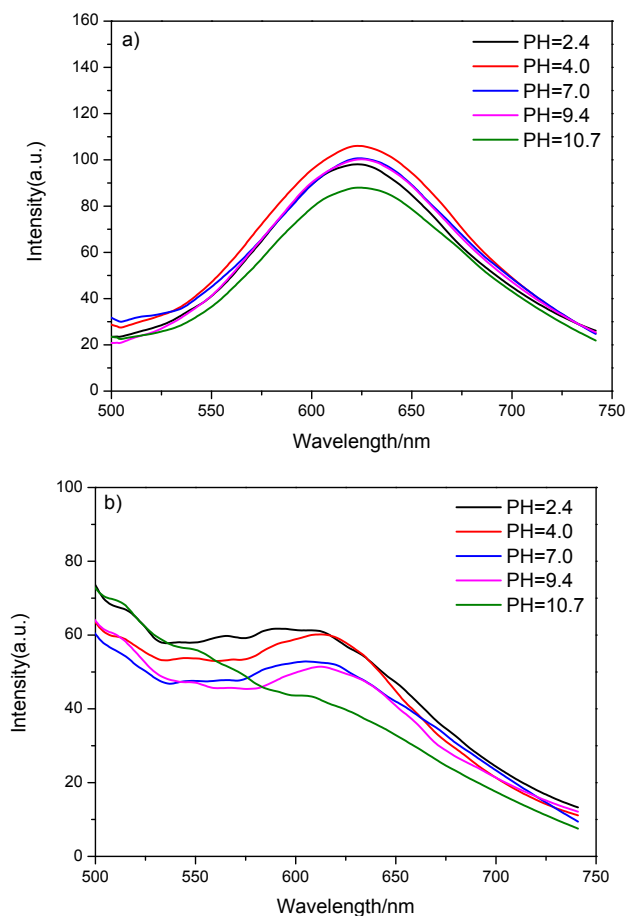

**Fig. 9** (a, b) The PL spectra of **T1-T2**, in different pH values at a concentration of  $1.0 \times 10^{-5}$  M. Excitation wavelength: 443 nm (**T1**), 409 nm (**T2**). PH = 2.4, 4.0, 7.0 were made by different buffer solutions being consisted of  $\text{Na}_2\text{HPO}_4$  and  $\text{C}_4\text{H}_2\text{O}_7 \cdot \text{H}_2\text{O}$ ; PH = 9.4, 10.7 were made by different buffer solutions being consisted of  $\text{Na}_2\text{CO}_3$  and  $\text{NaHCO}_3$ .
